# Supplementary material for: Direct salinization of trelagliptin from solid forms by mechanochemistry and its mechanism of salt formation
Source: Royal Society of Chemistry journal article supplement (doi:10.1039/d0ce00984a), 2020-01-01

Electronic Supplementary Material (ESI) for CrystEngComm.  
This journal is © The Royal Society of Chemistry 2020

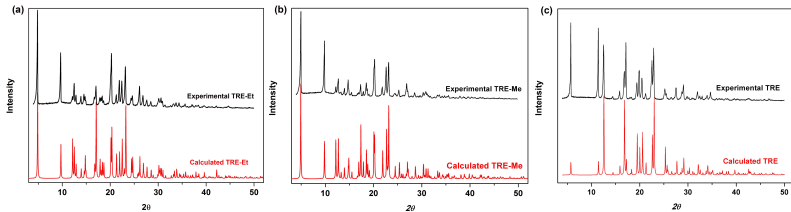

Supplement: d0ce00984a1.pdf [file d0ce00984a1.pdf]
